# Supplementary material
Source: HighWire-hosted journal article supplement (https://bmjopen.bmj.com/content/9/5/e028416)
Supplement: inline-supplementary-material-2 [file inline-supplementary-material-2.pdf]

**Supplemental File 2: Data Extraction Form**  
**Data Extraction Form for Quantitative Research**

|                                                                                 |  |
|---------------------------------------------------------------------------------|--|
| <b>Reference #</b>                                                              |  |
| <b>Reviewer and Date</b>                                                        |  |
| <b>Full Citation</b>                                                            |  |
| <b>Origin/Country</b>                                                           |  |
| <b>Study objective/research question</b>                                        |  |
| <b>Research Design</b>                                                          |  |
| <b>Sample size (total and by group)</b>                                         |  |
| <b>Setting, description of the type of long-term care facility</b>              |  |
| <b>Study population (demographics including sex)</b>                            |  |
| <b>Intervention description for treatment and control (if applicable)</b>       |  |
| <b>Type of responsive behaviour measured (e.g. verbal, physical, or sexual)</b> |  |
| <b>Individual level factor results</b>                                          |  |
| <b>Interpersonal level factor results</b>                                       |  |
| <b>Environmental level factors results</b>                                      |  |
| <b>Conclusions</b>                                                              |  |
| <b>Strengths and limitations</b>                                                |  |
| <b>Comments</b>                                                                 |  |

## Data Extraction Form for Qualitative Research

|                                                         |                     |
|---------------------------------------------------------|---------------------|
| <b>Reference #</b>                                      |                     |
| <b>Reviewer and Date</b>                                |                     |
| <b>Full Citation</b>                                    |                     |
| <b>Study objective/research question</b>                |                     |
| <b>Methodology</b>                                      |                     |
| <b>Method</b>                                           |                     |
| <b>Phenomena of Interest</b>                            |                     |
| <b>Setting, location, cultural details</b>              |                     |
| <b>Participants (demographics including sex)</b>        |                     |
| <b>Data Analysis Process</b>                            |                     |
| <b>Finding/theme and illustrative quote with page #</b> | Individual Level    |
|                                                         | Interpersonal Level |
|                                                         | Environmental Level |
| <b>Conclusions</b>                                      |                     |
| <b>Strengths and limitations</b>                        |                     |
| <b>Comments</b>                                         |                     |
